# Supplementary material
Source: PubMed Central journal article supplement (PMC5014650)

**A**

3 Weeks

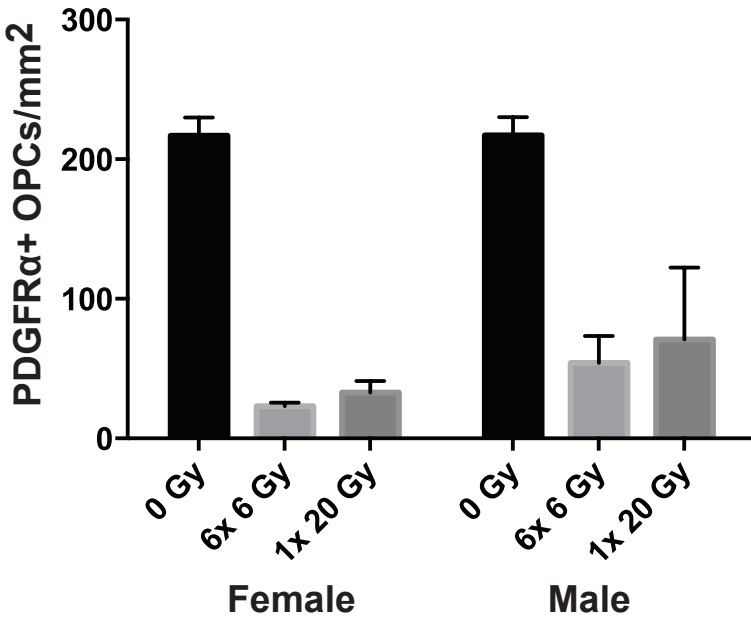**B**

18 Months

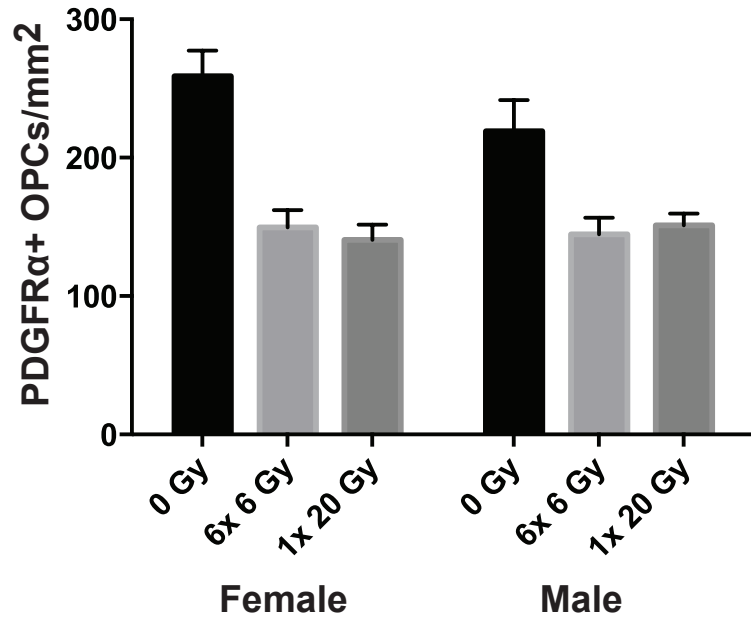

Supplement: NIHMS786802-supplement-1.pdf [file NIHMS786802-supplement-1.pdf]

**A**

6 Months

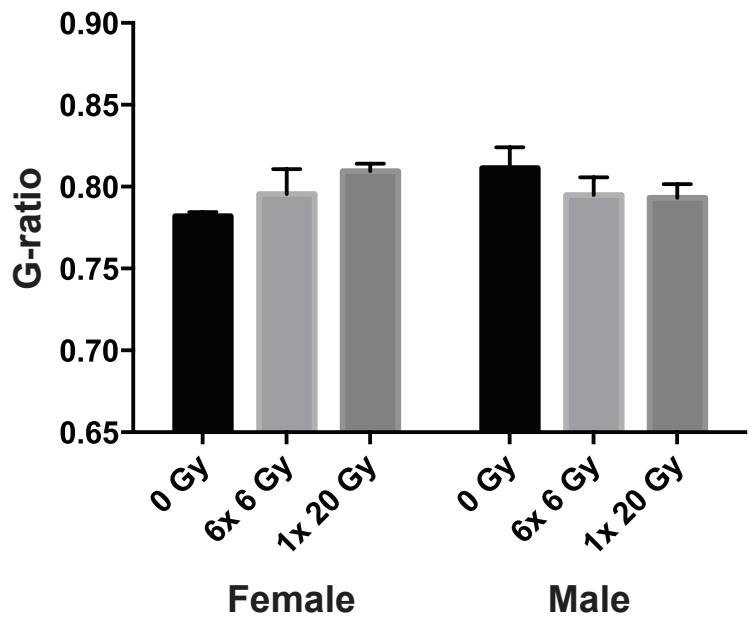**B**

18 Months

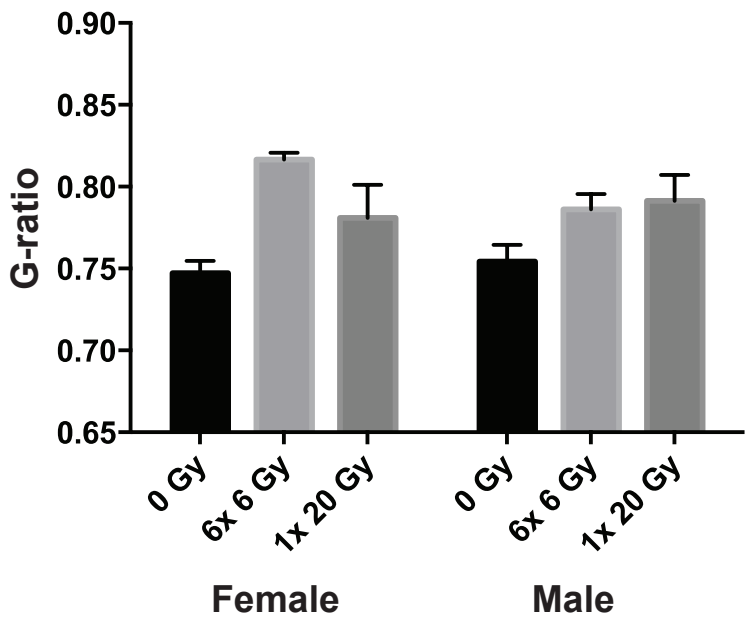

Supplement: NIHMS786802-supplement-2.pdf [file NIHMS786802-supplement-2.pdf]
